# Supplementary material for: Self-Assembly Nanoparticles of Natural Bioactive Abietane Diterpenes
Source: MDPI journal article supplement (doi:10.3390/ijms221910210), 2021-09-22

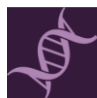

Article

# Self-assembly nanoparticles of natural bioactive abietane diterpenes

Epole Ntungwe <sup>1,2</sup>, Eva María Domínguez-Martín <sup>1,2</sup>, Gabrielle Bangay <sup>1,2</sup>, Catarina Garcia, Eleonora Colombo<sup>3</sup>,  
Andreia Rosatella<sup>1,4</sup>, Lucilia Saraiva <sup>5</sup>, Ana María Díaz-Lanza <sup>2</sup>, Daniele Passarella<sup>3</sup> and Patrícia Rijo <sup>1,4\*</sup>

- <sup>1</sup> CBIOS – Universidade Lusófona’s Research Center for Biosciences & Health Technologies, Campo Grande 376, 1749-024, Lisbon, Portugal; epole.ntungwe@ulusofona.pt; evam.dominguez@uah.es
- <sup>2</sup> University of Alcalá de Henares, Faculty of Pharmacy, Department of Biomedical Sciences, Pharmacology Area (Pharmacognosy Laboratory), New antitumor compounds: Toxic action on leukemia cells research group. Ctra. A2, Km 33.100 – Campus Universitario, 28805. Alcalá de Henares, Madrid, Spain; ana.diaz@uah.es
- <sup>3</sup> Dipartimento di Chimica, Università degli Studi di Milano, Via Golgi 19, 20133 Milano, Italy; eleonora.colombo@unimi.it
- <sup>4</sup> iMed.Ulisboa, Faculdade de Farmácia da Universidade de Lisboa, Av. Prof. Gama Pinto, 1649-003 Lisboa, Portugal; andreia.rosatella@ulusofona.pt
- <sup>5</sup> LAQV - Faculty of Pharmacy of University of Porto, Rua de Jorge Viterbo Ferreira, 228 4050-313, Porto, Portugal; lucilia.saraiva@ff.up.pt
- \* Correspondence: patricia.rijo@ulusofona.pt

---

## Supplementary Information

Figure S1:  $^1\text{H}$  NMR for 12BzRoy-Sq (7)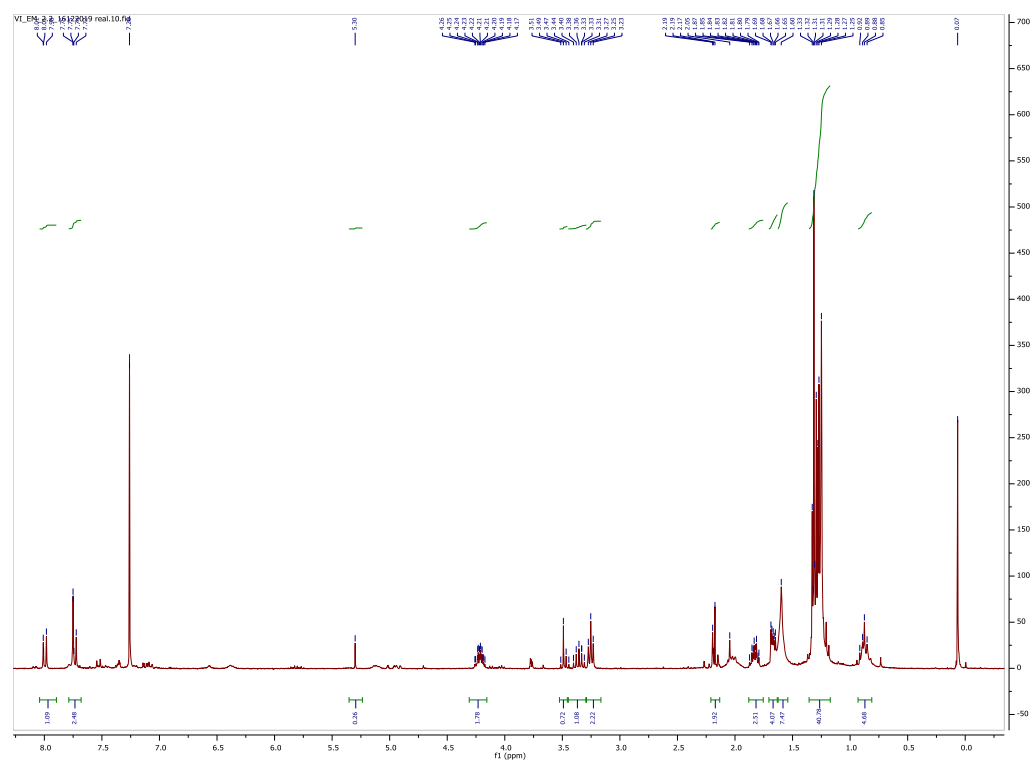Figure S2:  $^1\text{H}$  NMR for Roy-OA (5)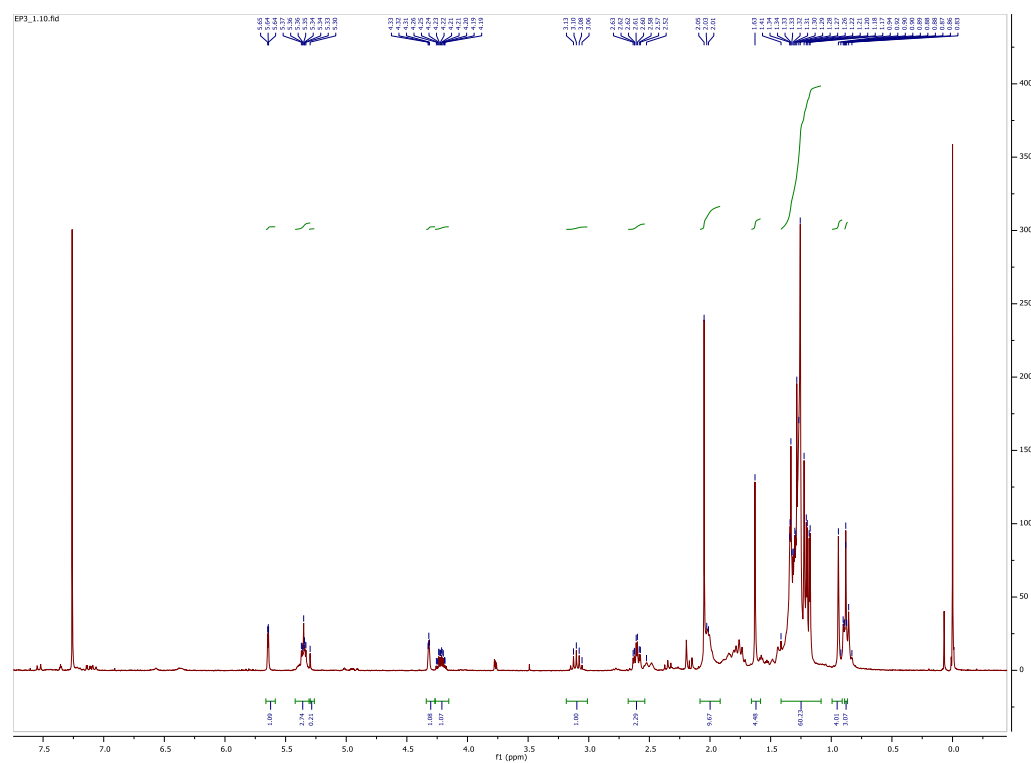

Supplement: s1 [file s1]
